# Supplementary material for: Generation of iPSC line from a Parkinson patient with PARK7 mutation and CRISPR-edited Gibco human episomal iPSC line to mimic PARK7 mutation
Source: PubMed Central journal article supplement (PMC8451958; doi:10.1016/j.scr.2021.102506), 2021-08-17
Supplement: NIHMS1739539-supplement-1.pdf [file NIHMS1739539-supplement-1.pdf]

# Supplemental Figure 1

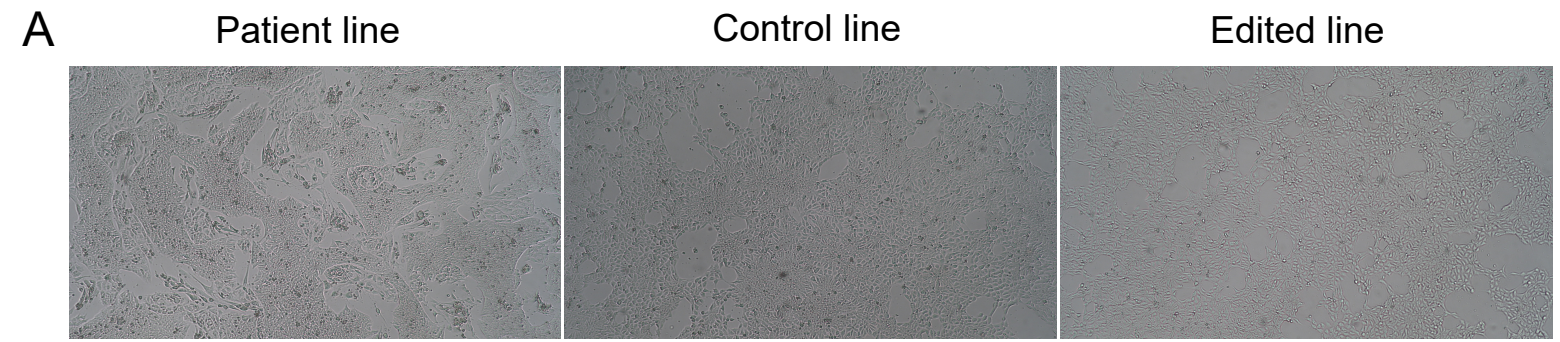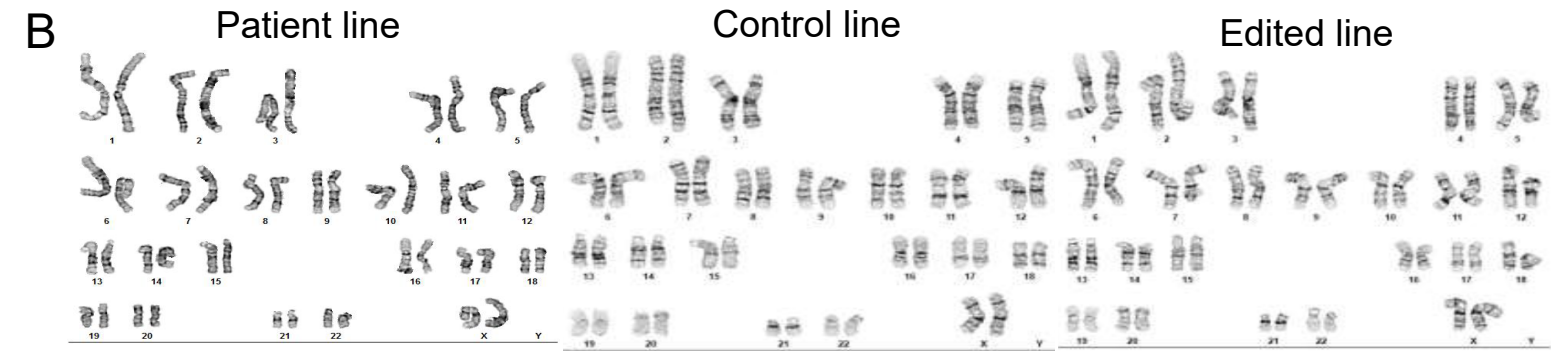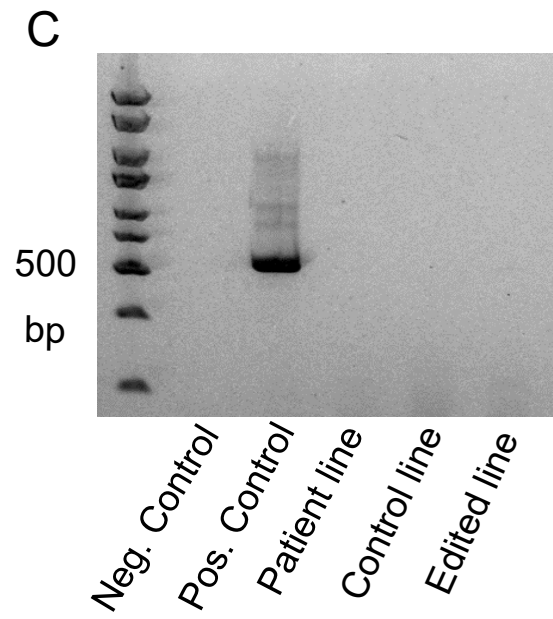

**D**

| Chromosome | Position  | Sequence                  | Strand | Mismatches |
|------------|-----------|---------------------------|--------|------------|
| chr1       | 35931977  | CTTAGGcCaTACTGCaCTGT(GGG) | +      | 3          |
| chr1       | 244191886 | CTTAGtTCCTACTGCTtTGc(TGG) | -      | 3          |
| chr2       | 162266236 | CTTtGccCCTACTGCTCTGT(TGG) | -      | 3          |
| chr8       | 104220814 | CTTAGGaCCTAaTGCTCTGc(AGG) | +      | 3          |
| chr15      | 65034637  | CTTtGGggCTACTGCTCTGT(GGG) | -      | 3          |
| chr19      | 28389307  | CTtGGTCCTgCTGCTCTGT(AGG)  | +      | 3          |
| chrY       | 8798586   | CTcAGGTCTCaGCTCTt(GGG)    | +      | 3          |
